# Supplementary material for: Intercalation of magnesium into a graphite-like layered material of composition BC2N
Source: Royal Society of Chemistry journal article supplement (doi:10.1039/c2cc31435e), 2012-01-01
Supplement: c2cc31435e.pdf [file c2cc31435e.pdf]

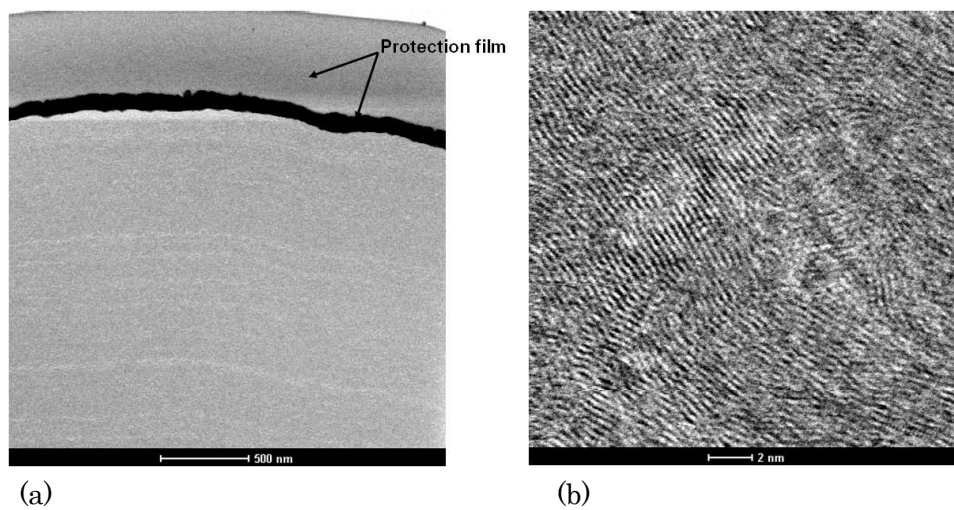

Suppl. 1 Bright-field scanning transmission electron micrographs of cross section of intercalation compound Mg-BC<sub>2</sub>N. A photograph (b) is enlarged from a part of (a).

(a)

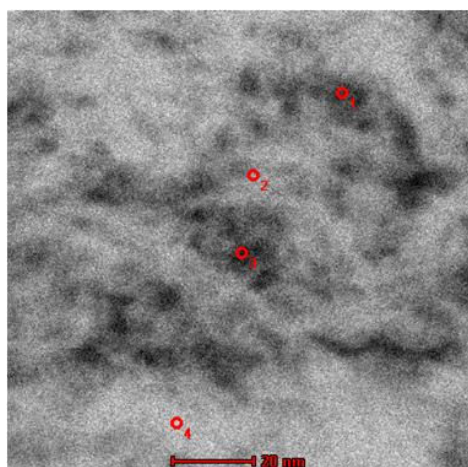

(b)

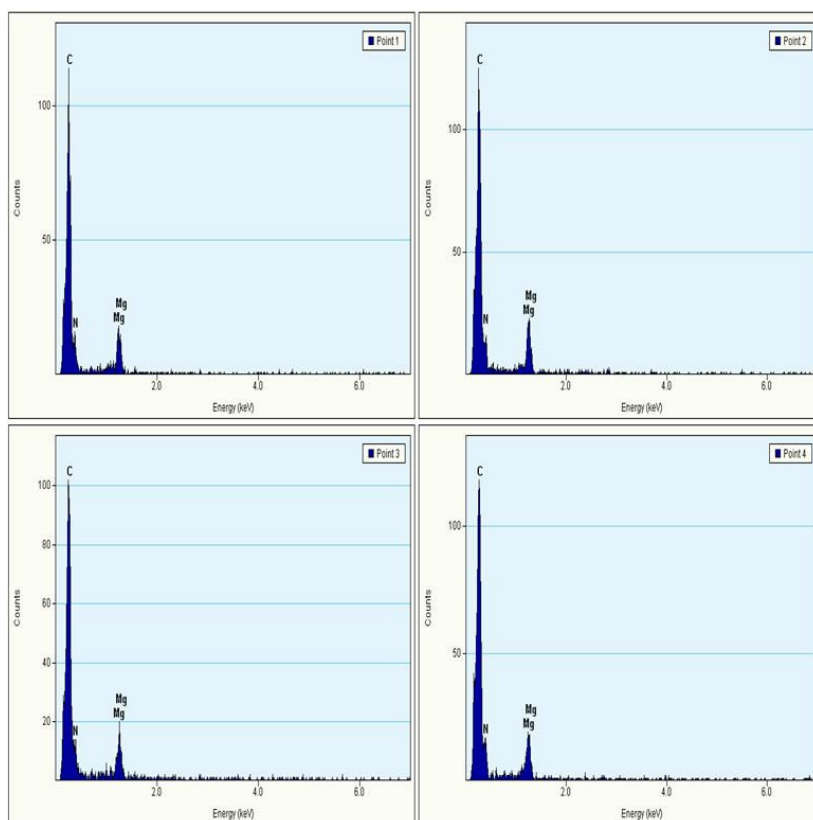

Suppl. 2 A high-angle annular dark-field image (a) and analytical results (b) by energy dispersive X-ray spectra of cross section of intercalation compound Mg-BC<sub>2</sub>N. Analytical results of points 1~4 in (b) were obtained from points 1~4 in (a).

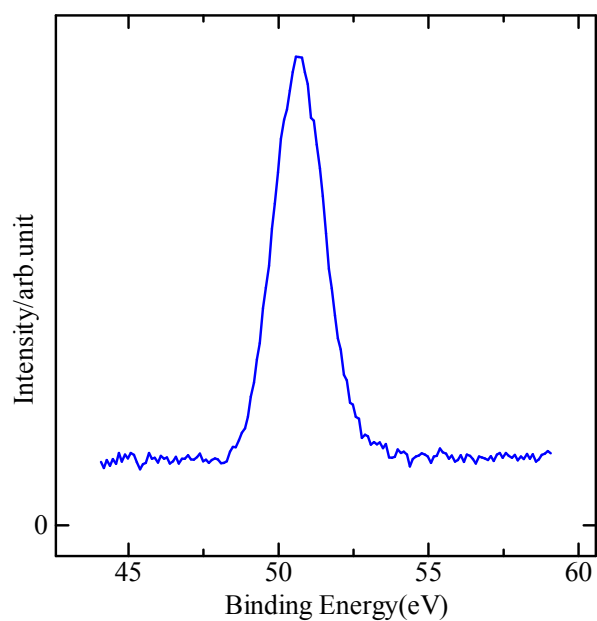

Suppl. 3 An ESCA Mg2p spectrum of intercalation compound Mg-BC<sub>2</sub>N.
